# Supplementary material for: Complete biosynthetic pathway of furochromones and its evolutionary mechanism in Apiaceae plants
Source: Research Square preprint supplement (doi:10.21203/rs.3.rs-4779533/v1), 2024-07-31
Supplement: Supplementary file 1 [file 1d5362d4b26cd956b945e371.xlsx]

## Sheet: INDEX
Supplementary Table Index
Table	Table content
Supplementary Table 1	Statistics of Sequencing data for genome assembly of S. divaricata
Supplementary Table 2	Statistics of genome features of S. divaricata
Supplementary Table 3	BUSCO assessment for the genome of S. divaricata
Supplementary Table 4	General statistics of each chromosome of S. divaricata
Supplementary Table 5	Statistics of RNA-Seq data of S. divaricata
Supplementary Table 6	Summary of the repetitive elements in the genome of S. divaricata
Supplementary Table 7	Pearson Correlation Coefficient (PCC) between the FPKM of candidate PKS Ⅲ genes and the total content of 5, 6, 8, 9.
Supplementary Table 8	PCC between the FPKMs of candidate PT genes and the total content of 5, 6, 8, 9.
Supplementary Table 9	1H and 13C NMR spectra data for peucenin (3) and visamminol (4).
Supplementary Table 10	PCC between the FPKMs of candidate CYP736 genes and the total content of 5, 6, 8, 9. Genes with PCCs over 0.70 are shown.
Supplementary Table 11	PCC between the FPKMs of candidate CYP450 genes and the total content of 8 and 9, genes with PCCs over 0.90 are shown.
Supplementary Table 12	PCC between the FPKMs of candidate MT genes and the total content of 5, 6, 8, 9, genes with PCCs over 0.70 are shown.
Supplementary Table 13	FPKMs of UGT genes among five tissue samples.
Supplementary Table 14	Data collection and refinement table of the SdUGT2 crystal.
Supplementary Table 15	Sources of the sampled Apiaceous species
Supplementary Table 16	Sources of the genome data of Apiaceous plants
Supplementary Table 17	Sources of the RNA-Seq data of Apiaceous plants
Supplementary Table 18	Plant tissues of Apiaceous species for metabolite determining and (or) RNA-Seq
Supplementary Table 19	Contents (mg/g, dry weight) of compounds 5, 6, 8, 9 in Apiaceae plants.
Supplementary Table 20	The FPKM values of SaDchr02G001052 and its syntenic and homologous genes in Apiaceae
Supplementary Table 21	PCR primers for gene cloning in this study.
Supplementary Table 22	HPLC and LC/MS methods used in this study.
Supplementary Table 23	Reaction conditions used for the determination of enzyme kinetic parameters.
Supplementary Table 24	Accession numbers of biosynthetic genes characterized in this study.

## Sheet: Table S1
Supplementary Table 1. Statistics of Sequencing data for genome assembly of S. divaricata
Library type	Plantform	Mean read length (bp)	Total data (Gbp)	Coverage
HiFi	PacBio Sequel II	15066	28.65	146.91 ×
Hi-C	HiSeq 4000	2 × 150	190.37	97.63 ×

## Sheet: Table S2
Supplementary Table 2. Statistics of genome features of S. divaricata
Feature	Value
Assembled genome size (bp)	1946622008
Pseudochromosome number	8
Number of Scaffold	2175
Scaffold N50 (bp)	237647500
Longest Scaffold (Mbp)	251402585
Number of Contigs	3052
Contig N50 (bp)	2326888
Longest Contig (bp)	12574331
GC percent (%)	39.55
Number of protein-coding genes	38701
Number of transcripts	65734
Mean transcript length (bp)	1473.26
Mean exon length (bp)	273.45
Mean exon per mRNA	5.73
Number of repetitive elements	1750401
Proportion of repetitive elements (%)	76.78

## Sheet: Table S3
Supplementary Table 3. BUSCO assessment for the genome of S. divaricata
BUSCO notation	Number	Percentage (%)
Complete	1551	96.1
Complete and single-copy	1408	87.2
Complete and duplicated	143	8.9
Fragmented	23	1.4
Missing	40	2.5
Total	1614	—

## Sheet: Table S4
Supplementary Table 4. General statistics of each chromosome of S. divaricata
Chromosome	Length (bp)	Gene Number
Chr1	251402585	7305
Chr2	251145000	7643
Chr3	249110415	7658
Chr4	237647500	6624
Chr5	236412886	7235
Chr6	213871328	6382
Chr7	207051500	6069
Chr8	188513962	5661
Total	1835155176	54577

## Sheet: Table S5
Supplementary Table 5. Statistics of RNA-Seq data of S. divaricata
Tissue	Library type	Plantform	Mean read length (bp)	Total raw reads (Gbp)	Total clean reads (Gbp)
Root-1A	RNA-Seq	HiSeq 4000	2 × 150	6.56	6.48
Root-1B	RNA-Seq	HiSeq 4000	2 × 150	6.37	6.3
Root-1C	RNA-Seq	HiSeq 4000	2 × 150	6.52	6.45
Root-2A	RNA-Seq	HiSeq 4000	2 × 150	6.37	6.25
Root-2B	RNA-Seq	HiSeq 4000	2 × 150	6.36	6.26
Root-2C	RNA-Seq	HiSeq 4000	2 × 150	6.52	6.41
Root-3A	RNA-Seq	HiSeq 4000	2 × 150	6.29	6.17
Root-3B	RNA-Seq	HiSeq 4000	2 × 150	6.41	6.26
Root-3C	RNA-Seq	HiSeq 4000	2 × 150	6.3	6.13
Leaf-A	RNA-Seq	HiSeq 4000	2 × 150	6.91	6.84
Leaf-B	RNA-Seq	HiSeq 4000	2 × 150	7.38	7.3
Leaf-C	RNA-Seq	HiSeq 4000	2 × 150	6.64	6.56
Petiole-A	RNA-Seq	HiSeq 4000	2 × 150	6.08	6.04
Petiole-B	RNA-Seq	HiSeq 4000	2 × 150	6.14	6.08
Petiole-C	RNA-Seq	HiSeq 4000	2 × 150	6.1	6.04

## Sheet: Table S6
Supplementary Table 6. Summary of the repetitive elements in the genome of S. divaricata
Element type		Element Number	Total length (bp)	Percentage of genome (%)
LTR	Copia	301631	462347077	23.78
	Gypsy	362444	430169926	22.12
	unknown	430062	358178955	18.42
TIR	CACTA	98616	52207918	2.68
	Mutator	86372	28152477	1.45
	PIF_Harbinger	47398	13742753	0.71
	Tc1_Mariner	55228	14781264	0.76
	hAT	62744	22543932	1.16
nonTIR	Helitron	305906	110847144	5.7
Total		1750401	1492971446	76.78

## Sheet: Table S7
Supplementary Table 7. Pearson Correlation Coefficient (PCC) between the FPKM of candidate PKSⅢ genes and the total content of 5, 6, 8, 9.
Gene	FPKM					PCC
	Root-1	Root-2	Root-3	Leaf	Petiole
SaDchr02G001054 (SdPCS)	149.08	219.35	117.72	0	0.06	0.95
SaDchr01G000050	0	0	0.02	0	0	0.26
SaDchr06G003810	0.22	0.05	0.05	0.12	0.26	-0.41
SaDchr08G003459	0.02	0.01	0	0	0.08	-0.42
SaDchr02G003311	0	0.08	0.12	0.23	0.05	-0.54
SaDchr05G002441	0.87	0.01	0.14	102.32	167.98	-0.94
SaDchr06G003819	0	0	0	0.02	0.03	-0.97
SaDchr06G003820	0.35	0	0	279	223.25	-0.98
SaDchr06G003809	1.27	0.74	0.4	158.15	160.15	-0.99
Note: Total content of 5, 6, 8 and 9 (μg/g, dw): Root-1, 4683.43; Root-2, 4645.99; Root-3, 3776.61; Petiole, 110.20; Leaf, 22.51. The candidate genes further investigated in this work are highlighted.

## Sheet: Table S8
Supplementary Table 8. PCC between the FPKMs of candidate PT genes and the total content of 5, 6, 8, 9.
Gene	FPKM					PCC
	Root-1	Root-2	Root-3	Leaf	Petiole
SaDchr03G003978	20.74	27	18.86	0.07	0.21	0.98
SaDchr03g003979_s2 (SdPT)	179.87	151.3	92.59	0.39	2.87	0.97
SaDchr03G003979	0.42	0.81	0	0	0	0.71
SaDchr02G003168	37.86	44.81	39.89	36.29	36.57	0.71
SaDchr03g003979_s1 (SdPT2)	145.89	146.85	93.43	122.41	80.29	0.59
SaDchr03G004044	0.57	0.77	0.66	0.72	0.87	0.16
SaDchr06G003084	16.61	26.52	21.52	24.72	20.74	-0.18
SaDchr03G000213	0	0	0	0.08	0	-0.62
SaDchr01G000279	2.22	3.05	3.64	4.92	3.1	-0.64
SaDchr06G000803	46.42	66.99	63.34	107.37	66.51	-0.7
SaDchr01G001966	9.06	2.2	0.83	5.04	20.18	-0.71
SaDchr03G002212	17.22	17.96	18.7	18.39	19.8	-0.71
SaDchr01G000282	3.91	5.61	5.75	8.17	6.22	-0.8
SaDchr01G002937	39.68	37.88	39.99	43.75	41.34	-0.87
SaDchr05G002870	2.45	4.81	6.17	52.47	30.65	-0.93
SaDchr03G000214	6.03	6.31	7.07	71.05	88.09	-0.98
Note: Total content of 5, 6, 8 and 9 (μg/g, dw): Root-1, 4683.43; Root-2, 4645.99; Root-3, 3776.61; Petiole, 110.20; Leaf, 22.51. The candidate genes further investigated in this work are highlighted.

## Sheet: Table S9
Supplementary Table 9. 1H and 13C NMR spectra data for peucenin (3) and visamminol (4).
	Peucenin		visamminol
position	δC, type	δH (J in Hz)	δC, type	δH (J in Hz)
2	166.6, C		167.5, C
3	107.5, CH	6.06 (1H, s)	108.6, CH	6.15 (1H, s)
4	181.3, C		182.2, C
5	158.1, C		157.2, C
6	111.1, C		109.5, C
7	164.8, C		166.4, C
8	93.3, CH	6.30 (1H, s)	88.5, CH	6.38 (1H, s)
9	155.9, C		158.4, C
10	102.5, C		105.2, C
1′	21.1, CH2	3.17 (2H, m)	26.6, CH2	3.02 (2H, d, J = 8.6Hz)
2′	122.7, CH	5.16 (1H, t, J = 6.0 Hz)	91.8, CH	4.71 (1H, t, J = 8.6Hz)
3′	129.0, C		70.5, C
4′	25.5, CH3	1.61 (3H,s)	25.3, CH3	1.14 (3H, s)
5′	17.7, CH3	1.71 (3H,s)	26.2, CH3	1.13 (3H, s)
11	19.8, CH3	2.30 (3H, s)	20.3, CH3	2.34 (3H, s)

[truncated: 15 more sheets: Table S10, Table S11, Table S12, Table S13, Table S14, Table S15, Table S16, Table S17, Table S18, Table S19, Table S20, Table S21, Table S22, Table S23, Table S24]
